# Supplementary material for: New insight into viscosity prediction of imidazolium-based ionic liquids and their mixtures with machine learning models
Source: Research Square preprint supplement (doi:10.21203/rs.3.rs-6354705/v1), 2025-04-25
Supplement: Supplementary file 1 [file e43db1a07cb4ca5fd5e173fd.docx]

**Supplementary Material for:**

**"New insight into viscosity prediction of imidazolium-based ionic liquids and their mixtures with machine learning models"**

Amir Hossein Sheikhshoaei, Ali Sanati*

Petroleum and Petrochemical Engineering School, Hakim Sabzevari University, Sabzevar, Iran

*Corresponding author email: a.sanati@hsu.ac.ir

1. **References for Viscosity Data Presented in the Study**

Tables S1 and S2 present the references of the collected viscosity data for imidazolium-based ILs and IL mixtures, respectively.

**Table S1.** Viscosity data collected for pure imidazolium-based ILs

| **Ionic liquid** | **Reference** |
| --- | --- |
| [C2Mim][BF4] | [1-19] |
| [C3Mim][BF4] | [6, 20] |
| [C4Mim][BF4] | [1, 2, 5, 12, 15-17, 19, 21-60] |
| [C5Mim][BF4] | [61] |
| [C6Mim][BF4] | [1, 6, 10, 15-17, 19, 26, 31, 43, 62-72] |
| [C8Mim][BF4] | [15, 17, 19, 36, 43, 66, 73, 74] |
| [C10Mim][BF4] | [17, 19, 59] |
| [C2Mim][PF6] | [17, 18] |
| [C3Mim][PF6] | [75] |
| [C4Mim][PF6] | [17, 22, 24, 27-29, 31, 35, 37, 42, 59, 63, 76-100] |
| [C5Mim][PF6] | [81] |
| [C6Mim][PF6] | [21, 26, 28, 63, 66, 67, 72, 81, 89, 98-103] |
| [C8Mim][PF6] | [17, 59, 67, 81, 86, 98-101, 104, 105] |
| [C10Mim][PF6] | [17] |
| [C2Mim][TF2N] | [4, 5, 7, 9, 18, 20, 22, 31, 37, 62, 63, 85, 89, 100, 106-128] |
| [C3Mim][TF2N] | [106, 110, 129-134] |
| [C4Mim][TF2N] | [20-22, 27-29, 31, 37, 60, 85, 92, 100, 106, 107, 109, 110, 112, 116, 119, 121, 124, 127, 133, 135-156] |
| [C5Mim][TF2N] | [81, 106, 110, 130, 157] |
| [C6Mim][TF2N] | [20, 24, 37, 63, 67, 72, 89, 100, 106, 110, 111, 117, 119, 124, 158-174] |
| [C8Mim][TF2N] | [20, 37, 89, 100, 103, 105, 106, 110, 115, 119, 156, 175-177] |
| [C10Mim][TF2N] | [63, 106, 110, 115, 178] |

**Table S2.** Viscosity data collected for imidazolium-based IL mixtures

| **Ionic liquid 1** | **Ionic liquid 2** | **Reference** |
| --- | --- | --- |
| [C2mim][OAc] | [C2mim][C2SO4] | [179] |
| [C2mim][SCN] | [C2mim][DCA] | [180] |
| [C2mim][SCN] | [C2mim][C2SO4] | [180] |
| [C4mim][BF4] | [C4mim][PF6] | [181] |
| [C4mim][BF4] | [C4mim][TF2N] | [27] |
| [C4mim][BF4] | [C4mim][C1SO4] | [181] |
| [C4mim][PF6] | [C4mim][TF2N] | [27, 182] |
| [C4mim][TF2N] | [C4mim][SCN] | [27] |
| [C4mim][TF2N] | [C4mim][DCA] | [27] |
| [C4mim][TF2N] | [C4mim][tfo] | [27] |
| [C4min][PF6] | [C4min][tfo] | [80] |
| [C2mim][BF4] | [C6mim][BF4] | [6, 181] |
| [C2mim][TF2N] | [C6mim][TF2N] | [127] |
| [C4mim][BF4] | [C6mim][BF4] | [181] |

**References**

[1] Sanmamed YA, González-Salgado D, Troncoso J, Romani L, Baylaucq A, Boned C. Experimental methodology for precise determination of density of RTILs as a function of temperature and pressure using vibrating tube densimeters. The Journal of Chemical Thermodynamics 2010;42(4):553-63.

[2] Neves CM, Kurnia KA, Coutinho JA, Marrucho IM, Lopes JNC, Freire MG, et al. Systematic study of the thermophysical properties of imidazolium-based ionic liquids with cyano-functionalized anions. The Journal of Physical Chemistry B 2013;117(35):10271-83.

[3] Fletcher SI, Sillars FB, Hudson NE, Hall PJ. Physical properties of selected ionic liquids for use as electrolytes and other industrial applications. Journal of Chemical & Engineering Data 2010;55(2):778-82.

[4] Seki S, Kobayashi T, Kobayashi Y, Takei K, Miyashiro H, Hayamizu K, et al. Effects of cation and anion on physical properties of room-temperature ionic liquids. Journal of Molecular Liquids 2010;152(1-3):9-13.

[5] Schreiner C, Zugmann S, Hartl R, Gores HJ. Fractional Walden rule for ionic liquids: examples from recent measurements and a critique of the so-called ideal KCl line for the Walden plot. Journal of Chemical & Engineering Data 2010;55(5):1784-8.

[6] Song D, Chen J. Density and viscosity data for mixtures of ionic liquids with a common anion. Journal of Chemical & Engineering Data 2014;59(2):257-62.

[7] Noda A, Hayamizu K, Watanabe M. Pulsed-gradient spin− echo 1H and 19F NMR ionic diffusion coefficient, viscosity, and ionic conductivity of non-chloroaluminate room-temperature ionic liquids. The Journal of Physical Chemistry B 2001;105(20):4603-10.

[8] Shamsipur M, Beigi AAM, Teymouri M, Pourmortazavi SM, Irandoust M. Physical and electrochemical properties of ionic liquids 1-ethyl-3-methylimidazolium tetrafluoroborate, 1-butyl-3-methylimidazolium trifluoromethanesulfonate and 1-butyl-1-methylpyrrolidinium bis (trifluoromethylsulfonyl) imide. Journal of Molecular Liquids 2010;157(1):43-50.

[9] Pameté E, Gorska B, Béguin F. Binary mixtures of ionic liquids based on EMIm cation and fluorinated anions: physico-chemical characterization in view of their application as low-temperature electrolytes. Journal of Molecular Liquids 2020;298:111959.

[10] Ciocirlan O. Viscosities of 1-Hexyl-3-methylimidazolium tetrafluoroborate and its binary mixtures with dimethyl sulfoxide and acetonitrile. Journal of Chemical & Engineering Data 2018;63(11):4205-14.

[11] Zhang S, Li X, Chen H, Wang J, Zhang J, Zhang M. Determination of Physical Properties for the Binary System of 1-Ethyl-3-methylimidazolium Tetrafluoroborate + H2O. Journal of Chemical & Engineering Data 2004;49(4):760-4. <https://doi.org/10.1021/je030191w>.

[12] He X, Shao Q, Kong W, Yu L, Zhang X, Deng Y. A simple method for estimating mutual diffusion coefficients of ionic liquids-water based on an optofluidic chip. Fluid Phase Equilibria 2014;366:9-15.

[13] Fan X-H, Chen Y-P, Su C-S. Density and viscosity measurements for binary mixtures of 1-Ethyl-3-methylimidazolium tetrafluoroborate ([Emim][BF4]) with dimethylacetamide, dimethylformamide, and dimethyl sulfoxide. Journal of Chemical & Engineering Data 2016;61(2):920-7.

[14] Narsimlu V, Reddy KS, Krishna TV, Mohan TM, Rao VS. Thermodynamic and theoretical investigations on [Emim][Bf4]/[Bmim][Bf4] and aniline binary mixtures. The Journal of Chemical Thermodynamics 2019;139:105891.

[15] Rilo E, Vila J, Garcia M, Varela LM, Cabeza O. Viscosity and electrical conductivity of binary mixtures of C n MIM-BF4 with ethanol at 288 K, 298 K, 308 K, and 318 K. Journal of Chemical & Engineering Data 2010;55(11):5156-63.

[16] Rilo E, Vila J, Pico J, García-Garabal S, Segade L, Varela LM, et al. Electrical conductivity and viscosity of aqueous binary mixtures of 1-alkyl-3-methyl imidazolium tetrafluoroborate at four temperatures. Journal of Chemical & Engineering Data 2010;55(2):639-44.

[17] Seddon KR, Stark A, Torres M-J. Viscosity and density of 1-alkyl-3-methylimidazolium ionic liquids. In: ACS Publications; 2002.

[18] McEwen AB, Ngo HL, LeCompte K, Goldman JL. Electrochemical properties of imidazolium salt electrolytes for electrochemical capacitor applications. Journal of the Electrochemical Society 1999;146(5):1687.

[19] Wang R, Qi X, Liu S, He Y, Deng Y. A comparison study on the properties of 1, 3-dialkylimidazolium tetrafluoroborate salts prepared by halogen-free and traditional method. Journal of Molecular Liquids 2016;221:339-45.

[20] McHale G, Hardacre C, Ge R, Doy N, Allen RW, MacInnes JM, et al. Density− viscosity product of small-volume ionic liquid samples using quartz crystal impedance analysis. Analytical chemistry 2008;80(15):5806-11.

[21] Harris KR, Kanakubo M, Woolf LA. Temperature and Pressure Dependence of the Viscosity of the Ionic Liquids 1-Hexyl-3-methylimidazolium Hexafluorophosphate and 1-Butyl-3-methylimidazolium Bis(trifluoromethylsulfonyl)imide. Journal of Chemical & Engineering Data 2007;52(3):1080-5. <https://doi.org/10.1021/je700032n>.

[22] Atilhan M, Jacquemin J, Rooney D, Khraisheh M, Aparicio S. Viscous Behavior of Imidazolium-Based Ionic Liquids. Industrial & Engineering Chemistry Research 2013;52(47):16774-85. <https://doi.org/10.1021/ie403065u>.

[23] Harris KR, Kanakubo M, Woolf LA. Temperature and pressure dependence of the viscosity of the ionic liquid 1-butyl-3-methylimidazolium tetrafluoroborate: viscosity and density relationships in ionic liquids. Journal of Chemical & Engineering Data 2007;52(6):2425-30.

[24] Salgado J, Regueira T, Lugo L, Vijande J, Fernández J, García J. Density and viscosity of three (2, 2, 2-trifluoroethanol+ 1-butyl-3-methylimidazolium) ionic liquid binary systems. The Journal of Chemical Thermodynamics 2014;70:101-10.

[25] Tomida D, Kumagai A, Qiao K, Yokoyama C. Viscosity of [bmim][PF6] and [bmim][BF4] at high pressure. International journal of thermophysics 2006;27(1):39-47.

[26] Vakili-Nezhaad G, Vatani M, Asghari M, Ashour I. Effect of temperature on the physical properties of 1-butyl-3-methylimidazolium based ionic liquids with thiocyanate and tetrafluoroborate anions, and 1-hexyl-3-methylimidazolium with tetrafluoroborate and hexafluorophosphate anions. The Journal of Chemical Thermodynamics 2012;54:148-54.

[27] Almeida HF, Canongia Lopes JN, Rebelo LP, Coutinho JoA, Freire MG, Marrucho IM. Densities and viscosities of mixtures of two ionic liquids containing a common cation. Journal of Chemical & Engineering Data 2016;61(8):2828-43.

[28] Kakinuma S, Ishida T, Shirota H. Femtosecond Raman-induced Kerr effect study of temperature-dependent intermolecular dynamics in imidazolium-based ionic liquids: effects of anion species and cation alkyl groups. The Journal of Physical Chemistry B 2017;121(1):250-64.

[29] Jin H, O'Hare B, Dong J, Arzhantsev S, Baker GA, Wishart JF, et al. Physical properties of ionic liquids consisting of the 1-butyl-3-methylimidazolium cation with various anions and the bis (trifluoromethylsulfonyl) imide anion with various cations. The Journal of Physical Chemistry B 2008;112(1):81-92.

[30] Iwasaki K, Yoshii K, Tsuda T, Kuwabata S. Physicochemical properties of phenyltrifluoroborate-based room temperature ionic liquids. Journal of Molecular Liquids 2017;246:236-43.

[31] Beigi AAM, Abdouss M, Yousefi M, Pourmortazavi SM, Vahid A. Investigation on physical and electrochemical properties of three imidazolium based ionic liquids (1-hexyl-3-methylimidazolium tetrafluoroborate, 1-ethyl-3-methylimidazolium bis (trifluoromethylsulfonyl) imide and 1-butyl-3-methylimidazolium methylsulfate). Journal of Molecular Liquids 2013;177:361-8.

[32] Song D, Chen J. Densities and viscosities for ionic liquids mixtures containing [eOHmim][BF4],[bmim][BF4] and [bpy][BF4]. The Journal of Chemical Thermodynamics 2014;77:137-43.

[33] Gao J, Wagner NJ. Non-ideal viscosity and excess molar volume of mixtures of 1-butyl-3-methylimidazolium tetrafluoroborate ([C4mim][BF4]) with water. Journal of Molecular Liquids 2016;223:678-86.

[34] Nikitina VA, Nazet A, Sonnleitner T, Buchner R. Properties of sodium tetrafluoroborate solutions in 1-butyl-3-methylimidazolium tetrafluoroborate ionic liquid. Journal of Chemical & Engineering Data 2012;57(11):3019-25.

[35] Sánchez LG. Functionalized ionic liquids: absorption solvents for carbon dioxide and olefin separation. 2008.

[36] Sanchez LG, Espel JR, Onink F, Meindersma GW, Haan ABd. Density, viscosity, and surface tension of synthesis grade imidazolium, pyridinium, and pyrrolidinium based room temperature ionic liquids. Journal of Chemical & Engineering Data 2009;54(10):2803-12.

[37] Tokuda H, Tsuzuki S, Susan MABH, Hayamizu K, Watanabe M. How ionic are room-temperature ionic liquids? An indicator of the physicochemical properties. The Journal of Physical Chemistry B 2006;110(39):19593-600.

[38] Ahmad W, Al-Ajmi A, Vakili-Nezhaad GR. Investigation of physico-chemical properties for the 1-butyl-3-methylimidazolium tetrafluoroborate ([Bmim][BF 4])–diethylenetriamine (DETA) system for CO 2 capture. Journal of Solution Chemistry 2019;48:578-610.

[39] Pandit SA, Rather MA, Bhat SA, Rather GM, Bhat MA. Influence of the anion on the equilibrium and transport properties of 1-butyl-3-methylimidazolium based room temperature ionic liquids. Journal of Solution Chemistry 2016;45:1641-58.

[40] Sánchez LG, Meindersma G, De Haan A. Solvent properties of functionalized ionic liquids for CO2 absorption. Chemical Engineering Research and Design 2007;85(1):31-9.

[41] Zhou Q, Wang L-S, Chen H-P. Densities and viscosities of 1-butyl-3-methylimidazolium tetrafluoroborate+ H2O binary mixtures from (303.15 to 353.15) K. Journal of Chemical & Engineering Data 2006;51(3):905-8.

[42] Li W, Zhang Z, Han B, Hu S, Xie Y, Yang G. Effect of water and organic solvents on the ionic dissociation of ionic liquids. The Journal of Physical Chemistry B 2007;111(23):6452-6.

[43] Sanmamed Y, González-Salgado D, Troncoso J, Cerdeirina C, Romani L. Viscosity-induced errors in the density determination of room temperature ionic liquids using vibrating tube densitometry. Fluid phase equilibria 2007;252(1-2):96-102.

[44] Sarkoohaki B, Karimkhani M, Almasi M, Najafloo A, Mansouri S. Density and Viscosity for Binary Mixtures of the Ionic Liquid 1-Butyl-3-methylimidazolium Tetrafluoroborate with 2-Propanol, N, N-Dimethylacetamide and N, N-Dimethylformamide at 293.15–323.15 K: Experimental and PC-SAFT Modeling. Journal of Solution Chemistry 2020;49(3):405-21.

[45] Chaudhary N, Nain AK. Densities, ultrasonic speeds, viscosities, refractive indices, and excess properties of 1-butyl-3-methylimidazolium tetrafluoroborate+ n-methylacetamide binary mixtures at different temperatures. Journal of Chemical & Engineering Data 2020;65(4):1447-59.

[46] Chaudhary N, Nain AK. Volumetric, ultrasonic, viscometric and refractive index studies of molecular interactions in binary mixtures of 1-butyl-3-methylimidazolium tetrafluoroborate with methyl acrylate at temperatures from 293.15 to 318.15 K. Journal of Molecular Liquids 2020;297:111890.

[47] Moosavi M, Daneshvar A. Synergistic effects and specific molecular interactions in the binary mixtures of [bmim][BF4] and poly (ethylene glycol) s. Journal of Molecular Liquids 2017;225:810-21.

[48] Li J, Zhu H, Peng C, Liu H. Densities and viscosities for ionic liquids [BMIM][BF4] and [BMIM][Cl] and their binary mixtures at various temperatures and atmospheric pressure. Chinese Journal of Chemical Engineering 2019;27(12):2994-9.

[49] Tian S, Hou Y, Wu W, Ren S, Pang K. Physical properties of 1-butyl-3-methylimidazolium tetrafluoroborate/N-methyl-2-pyrrolidone mixtures and the solubility of CO2 in the system at elevated pressures. Journal of Chemical & Engineering Data 2012;57(3):756-63.

[50] Vercher E, Llopis FJ, González-Alfaro V, Miguel PJ, Orchillés V, Martínez-Andreu A. Volumetric properties, viscosities and refractive indices of binary liquid mixtures of tetrafluoroborate-based ionic liquids with methanol at several temperatures. The Journal of Chemical Thermodynamics 2015;90:174-84.

[51] Yang X, Fang Y. A volumetric and viscosity study for the binary mixtures of ammonium-based asymmetrical Gemini ionic liquids with alcohols at T= 293.15–333.15 K. Journal of Chemical & Engineering Data 2019;64(2):722-35.

[52] Yin Y, Zhu C, Ma Y. Volumetric and viscometric properties of binary and ternary mixtures of 1-butyl-3-methylimidazolium tetrafluoroborate, monoethanolamine and water. The Journal of Chemical Thermodynamics 2016;102:413-28.

[53] Yusoff R, Aroua M, Shamiri A, Ahmady A, Jusoh N, Asmuni N, et al. Density and viscosity of aqueous mixtures of N-methyldiethanolamines (MDEA) and ionic liquids. Journal of Chemical & Engineering Data 2013;58(2):240-7.

[54] Zhao Y, Zhang X, Zeng S, Zhou Q, Dong H, Tian X, et al. Density, viscosity, and performances of carbon dioxide capture in 16 absorbents of amine+ ionic liquid+ H2O, ionic liquid+ H2O, and amine+ H2O systems. Journal of Chemical & Engineering Data 2010;55(9):3513-9.

[55] Govinda V, Attri P, Venkatesu P, Venkateswarlu P. Evaluation of thermophysical properties of ionic liquids with polar solvent: a comparable study of two families of ionic liquids with various ions. The journal of physical chemistry B 2013;117(41):12535-48.

[56] Kavitha T, Vasantha T, Venkatesu P, Devi RR, Hofman T. Thermophysical properties for the mixed solvents of N-methyl-2-pyrrolidone with some of the imidazolium-based ionic liquids. Journal of Molecular Liquids 2014;198:11-20.

[57] Wu J-Y, Chen Y-P, Su C-S. The densities and viscosities of a binary liquid mixture of 1-n-butyl-3-methylimidazolium tetrafluoroborate,([Bmim][BF4]) with acetone, methyl ethyl ketone and N, N-dimethylformamide, at 303.15 to 333.15 K. Journal of the Taiwan Institute of Chemical Engineers 2014;45(5):2205-11.

[58] Wu J-Y, Chen Y-P, Su C-S. Density and viscosity of ionic liquid binary mixtures of 1-n-butyl-3-methylimidazolium tetrafluoroborate with acetonitrile, N, N-dimethylacetamide, methanol, and N-methyl-2-pyrrolidone. Journal of Solution Chemistry 2015;44:395-412.

[59] Branco LC, Rosa JN, Moura Ramos JJ, Afonso CA. Preparation and characterization of new room temperature ionic liquids. Chemistry–A European Journal 2002;8(16):3671-7.

[60] Andanson J-M, Meng X, Traïkia M, Husson P. Quantification of the impact of water as an impurity on standard physico-chemical properties of ionic liquids. The Journal of Chemical Thermodynamics 2016;94:169-76.

[61] Wu T-Y, Chen B-K, Hao L, Lin K-F, Sun I-W. Thermophysical properties of a room temperature ionic liquid (1-methyl-3-pentyl-imidazolium hexafluorophosphate) with poly (ethylene glycol). Journal of the Taiwan Institute of Chemical Engineers 2011;42(6):914-21.

[62] Harris KR, Kanakubo M. Temperature and Pressure Dependence of the Viscosity of the Ionic Liquids 1-Hexyl-3-methylimidazolium Tetrafluoroborate and 1-Ethyl-and 1-Hexyl-3-methylimidazolium Bis (trifluoromethylsulfonyl) amides. Journal of Chemical & Engineering Data 2021;66(12):4618-28.

[63] Ahosseini A, Scurto AM. Viscosity of imidazolium-based ionic liquids at elevated pressures: cation and anion effects. International Journal of Thermophysics 2008;29:1222-43.

[64] Tomida D, Kenmochi S, Tsukada T, Qiao K, Bao Q, Yokoyama C. Viscosity and thermal conductivity of 1-hexyl-3-methylimidazolium tetrafluoroborate and 1-octyl-3-methylimidazolium tetrafluoroborate at pressures up to 20 MPa. International Journal of Thermophysics 2012;33:959-69.

[65] Kermanpour F, Niakan H. Measurement and modeling the excess molar properties of binary mixtures of {[C6mim][BF4]+ 3-amino-1-propanol} and {[C6mim][BF4]+ isobutanol}: Application of Prigogine–Flory–Patterson theory. The Journal of Chemical Thermodynamics 2012;48:129-39.

[66] Ning H, Hou M, Mei Q, Liu Y, Yang D, Han B. The physicochemical properties of some imidazolium-based ionic liquids and their binary mixtures. Science China Chemistry 2012;55:1509-18.

[67] Muhammad A, Mutalib MA, Wilfred C, Murugesan T, Shafeeq A. Thermophysical properties of 1-hexyl-3-methyl imidazolium based ionic liquids with tetrafluoroborate, hexafluorophosphate and bis (trifluoromethylsulfonyl) imide anions. The Journal of Chemical Thermodynamics 2008;40(9):1433-8.

[68] Akbar MM, Murugesan T. Thermophysical properties of 1-hexyl-3-methylimidazolium tetrafluoroborate [hmim][BF4]+ N-methyldiethanolamine (MDEA) at temperatures (303.15 to 323.15) K. Journal of Molecular Liquids 2013;177:54-9.

[69] Kermanpour F. The excess molar properties of {x1 [C6min][BF4]+ x22-propanol}: Application of ERAS model. Journal of Molecular Liquids 2012;169:156-62.

[70] Kermanpour F, Sharifi T. Thermodynamic study of binary mixture of x1 [C6mim][BF4]+ x21-propanol: Measurements and molecular modeling. Thermochimica acta 2012;527:211-8.

[71] Haghani A, Saeva DR, Iloukhani H, Hoffmann MM. Comparing composition-and temperature-dependent viscosities of binary systems involving ionic liquids. Journal of Chemical & Engineering Data 2015;60(11):3272-88.

[72] Diogo JC, Caetano FJ, Fareleira JM, Wakeham WA. Viscosity measurements on ionic liquids: a cautionary tale. International journal of thermophysics 2014;35(9):1615-35.

[73] Safarov JT, Namazova A, Shahverdiyev AN, Hassel EP. Experimental investigation of thermophysical properties of 1-octyl-3-methylimidazolium tetrafluoroborate at ambient pressure. PROCESSES OF PETROCHEMISTRY AND OIL REFINING 2016;17(3):226-43.

[74] Restolho J, Serro AP, Mata JL, Saramago B. Viscosity and surface tension of 1-ethanol-3-methylimidazolium tetrafluoroborate and 1-methyl-3-octylimidazolium tetrafluoroborate over a wide temperature range. Journal of Chemical & Engineering Data 2009;54(3):950-5.

[75] Neves CM, Batista ML, Cláudio AFM, Santos LM, Marrucho IM, Freire MG, et al. Thermophysical properties and water saturation of [PF6]-based ionic liquids. Journal of Chemical & Engineering Data 2010;55(11):5065-73.

[76] Harris KR, Woolf LA, Kanakubo M. Temperature and Pressure Dependence of the Viscosity of the Ionic Liquid 1-Butyl-3-methylimidazolium Hexafluorophosphate. Journal of Chemical & Engineering Data 2005;50(5):1777-82. <https://doi.org/10.1021/je050147b>.

[77] Qiao Y, Yan F, Xia S, Yin S, Ma P. Densities and viscosities of [Bmim][PF6] and binary systems [Bmim][PF6]+ ethanol,[Bmim][PF6]+ benzene at several temperatures and pressures: determined by the falling-ball method. Journal of chemical & engineering data 2011;56(5):2379-85.

[78] Yan Q, Fangyou Y, Shuqian X, Peisheng M. Densities and viscosities of 1-butyl-3-methylimidazolium hexafluorophosphate [bmim][PF6]+ CO2 binary system: determination and correlation. Chinese Journal of Chemical Engineering 2013;21(11):1284-90.

[79] Bouarab AF, Martins MA, Stolarska O, Smiglak M, Harvey J-P, Coutinho JA, et al. Physical properties and solid-liquid equilibria for hexafluorophosphate-based ionic liquid ternary mixtures and their corresponding subsystems. Journal of Molecular Liquids 2020;316:113742.

[80] Páez MS, Vega YA, Romero CM. Effect of temperature on the viscosities and the volumetric properties of the binary mixtures of the ionic liquids [bmim][PF6] and [bmim][CF3SO3]. Journal of Molecular Liquids 2017;243:78-84.

[81] Rocha MA, Ribeiro FM, Ferreira AIL, Coutinho JA, Santos LM. Thermophysical properties of [CN− 1C1im][PF6] ionic liquids. Journal of Molecular Liquids 2013;188:196-202.

[82] Fan W, Zhou Q, Sun J, Zhang S. Density, excess molar volume, and viscosity for the methyl methacrylate+ 1-butyl-3-methylimidazolium hexafluorophosphate ionic liquid binary system at atmospheric pressure. Journal of Chemical & Engineering Data 2009;54(8):2307-11.

[83] Baker SN, Baker GA, Kane MA, Bright FV. The cybotactic region surrounding fluorescent probes dissolved in 1-butyl-3-methylimidazolium hexafluorophosphate: effects of temperature and added carbon dioxide. The Journal of Physical Chemistry B 2001;105(39):9663-8.

[84] Jiqin Z, Jian C, Chengyue L, Weiyang F. Viscosities and interfacial properties of 1-methyl-3-butylimidazolium hexafluorophosphate and 1-isobutenyl-3-methylimidazolium tetrafluoroborate ionic liquids. Journal of Chemical & Engineering Data 2007;52(3):812-6.

[85] Yadav A, Guha A, Pandey A, Pal M, Trivedi S, Pandey S. Densities and dynamic viscosities of ionic liquids having 1-butyl-3-methylimidazolium cation with different anions and bis (trifluoromethylsulfonyl) imide anion with different cations in the temperature range (283.15 to 363.15) K. The Journal of Chemical Thermodynamics 2018;116:67-75.

[86] AlTuwaim MS, Alkhaldi KH, Al-Jimaz AS, Mohammad AA. Temperature dependence of physicochemical properties of imidazolium-, pyroldinium-, and phosphonium-based ionic liquids. Journal of Chemical & Engineering Data 2014;59(6):1955-63.

[87] Geng Y, Chen S, Wang T, Yu D, Peng C, Liu H, et al. Density, viscosity and electrical conductivity of 1-butyl-3-methylimidazolium hexafluorophosphate+ monoethanolamine and+ N, N-dimethylethanolamine. Journal of Molecular Liquids 2008;143(2-3):100-8.

[88] Tomida D, Kumagai A, Qiao K, Yokoyama C. Viscosity of 1-butyl-3-methylimidazolium hexafluorophosphate+ CO2 mixture. Journal of Chemical & Engineering Data 2007;52(5):1638-40.

[89] Papović S, Bešter-Rogač M, Vraneš M, Gadžurić S. The effect of the alkyl chain length on physicochemical features of (ionic liquids+ γ-butyrolactone) binary mixtures. The Journal of Chemical Thermodynamics 2016;99:1-10.

[90] Singh MP, Mandal SK, Verma YL, Gupta AK, Singh RK, Chandra S. Viscoelastic, surface, and volumetric properties of ionic liquids [BMIM][OcSO4],[BMIM][PF6], and [EMIM][MeSO3]. Journal of Chemical & Engineering Data 2014;59(8):2349-59.

[91] Yanfang G, Tengfang W, Dahong Y, Changjun P, Honglai L, Ying H. Densities and viscosities of the ionic liquid [C4mim][PF6]+ N, N-dimethylformamide binary mixtures at 293.15 K to 318.15 K. Chinese Journal of Chemical Engineering 2008;16(2):256-62.

[92] Goddu B, Tadavarthi MM, Tadekoru VK, Guntupalli JN. Density, speed of sound, and dynamic viscosity of 1-butyl-3-methylimidazolium bis (trifluoromethylsulfonyl) imide/1-butyl-3-methylimidazolium hexafluorophosphate and N-methylaniline binary systems from T= 298.15 to 323.15 K at 0.1 MPa. Journal of Chemical & Engineering Data 2019;64(6):2303-19.

[93] Moosavi M, Daneshvar A. Investigation of the rheological properties of two imidazolium-based ionic liquids. Journal of Molecular Liquids 2014;190:59-67.

[94] Moosavi M, Daneshvar A, Sedghamiz E. Rheological properties of {[bmim] PF6+ methanol} mixtures at different temperatures, shear rates and compositions. Journal of Molecular Liquids 2015;209:693-705.

[95] Sharma A, Julcour C, Kelkar AA, Deshpande RM, Delmas H. Mass transfer and solubility of CO and H2 in ionic liquid. Case of [Bmim][PF6] with gas-inducing stirrer reactor. Industrial & engineering chemistry research 2009;48(8):4075-82.

[96] Koller TM, Lenahan FD, Schmidt PS, Klein T, Mehler J, Maier F, et al. Surface Tension and Viscosity of Binary Mixtures of the Fluorinated and Non-fluorinated Ionic Liquids [PFBMIm][PF 6] and [C 4 C 1 Im][PF 6] by the Pendant Drop Method and Surface Light Scattering. International journal of thermophysics 2020;41:1-24.

[97] Bennett V, Dikio C, Angaye S, Wankasi D, Dikio E, Bahadur I, et al. Interactions of 1-butyl-3-methylimidazolium hexafluorophosphate with N, N-dimethylformamide: Density and viscosity measurements. Journal of molecular liquids 2016;219:661-6.

[98] Huddleston JG, Visser AE, Reichert WM, Willauer HD, Broker GA, Rogers RD. Characterization and comparison of hydrophilic and hydrophobic room temperature ionic liquids incorporating the imidazolium cation. Green chemistry 2001;3(4):156-64.

[99] Liu J-f, Jiang G-b, Chi Y-g, Cai Y-q, Zhou Q-x, Hu J-T. Use of ionic liquids for liquid-phase microextraction of polycyclic aromatic hydrocarbons. Analytical Chemistry 2003;75(21):5870-6.

[100] Nakamura K, Shikata T. Systematic Dielectric and NMR Study of the Ionic Liquid 1‐Alkyl‐3‐Methyl Imidazolium. ChemPhysChem 2010;11(1):285-94.

[101] Tomida D, Kumagai A, Kenmochi S, Qiao K, Yokoyama C. Viscosity of 1-hexyl-3-methylimidazolium hexafluorophosphate and 1-octyl-3-methylimidazolium hexafluorophosphate at high pressure. Journal of Chemical & Engineering Data 2007;52(2):577-9.

[102] Li J-G, Hu Y-F, Ling S, Zhang J-Z. Physicochemical properties of [C6mim][PF6] and [C6mim][(C2F5) 3PF3] ionic liquids. Journal of Chemical & Engineering Data 2011;56(7):3068-72.

[103] Fitchett BD, Knepp TN, Conboy JC. 1-Alkyl-3-methylimidazolium bis (perfluoroalkylsulfonyl) imide water-immiscible ionic liquids: the effect of water on electrochemical and physical properties. Journal of the Electrochemical Society 2004;151(7):E219.

[104] Safarov J, Bussemer C, Aliyev A, Lafuente C, Hassel E, Abdulagatov I. Effect of temperature on thermal (density), caloric (heat capacity), acoustic (speed of sound) and transport (viscosity) properties of 1-octyl-3-methylimidazolium hexafluorophosphate at atmospheric pressure. The Journal of Chemical Thermodynamics 2018;124:49-64.

[105] Harris KR, Kanakubo M, Woolf LA. Temperature and pressure dependence of the viscosity of the ionic liquids 1-methyl-3-octylimidazolium hexafluorophosphate and 1-methyl-3-octylimidazolium tetrafluoroborate. Journal of Chemical & Engineering Data 2006;51(3):1161-7.

[106] Tariq M, Carvalho PJ, Coutinho JA, Marrucho IM, Lopes JNC, Rebelo LP. Viscosity of (C2–C14) 1-alkyl-3-methylimidazolium bis (trifluoromethylsulfonyl) amide ionic liquids in an extended temperature range. Fluid Phase Equilibria 2011;301(1):22-32.

[107] Liu Q, Ma L, Wang S, Ni Z, Fu X, Wang J, et al. Study on the properties of density, viscosity, excess molar volume, and viscosity deviation of [C2mim][NTf2],[C2mmim][NTf2],[C4mim][NTf2], and [C4mmim][NTf2] with PC binary mixtures. Journal of Molecular Liquids 2021;325:114573.

[108] Makino T, Kanakubo M, Masuda Y, Umecky T, Suzuki A. CO2 absorption properties, densities, viscosities, and electrical conductivities of ethylimidazolium and 1-ethyl-3-methylimidazolium ionic liquids. Fluid Phase Equilibria 2014;362:300-6.

[109] Hofmann A, Migeot M, Hanemann T. Investigation of binary mixtures containing 1-ethyl-3-methylimidazolium bis (trifluoromethanesulfonyl) azanide and ethylene carbonate. Journal of Chemical & Engineering Data 2016;61(1):114-23.

[110] Aljasmi A, AlJimaz AS, AlKhaldi KH, AlTuwaim MS. Dependency of physicochemical properties of imidazolium bis (trifluoromethylsulfonyl) imide-based ionic liquids on temperature and alkyl chain. Journal of Chemical & Engineering Data 2022;67(4):858-68.

[111] Seoane RG, Corderí S, Gomez E, Calvar N, Gonzalez EJ, Macedo EA, et al. Temperature dependence and structural influence on the thermophysical properties of eleven commercial ionic liquids. Industrial & engineering chemistry research 2012;51(5):2492-504.

[112] Bonhote P, Dias A-P, Papageorgiou N, Kalyanasundaram K, Grätzel M. Hydrophobic, highly conductive ambient-temperature molten salts. Inorganic chemistry 1996;35(5):1168-78.

[113] Bruce DW, Cabry CP, Canongia Lopes JN, Costen ML, D’Andrea La, Grillo I, et al. Nanosegregation and Structuring in the Bulk and at the Surface of Ionic-Liquid Mixtures. The Journal of Physical Chemistry B 2017;121(24):6002-20.

[114] Chaabene N, Ngo K, Turmine M, Vivier V. New hydrophobic deep eutectic solvent for electrochemical applications. Journal of Molecular Liquids 2020;319:114198.

[115] Khalil R, Chaabene N, Azar M, Malham IB, Turmine M. Effect of the chain lengthening on transport properties of imidazolium-based ionic liquids. Fluid Phase Equilibria 2020;503:112316.

[116] Liu Q, Zhao L, Zheng Q, Mou L, Zhang P. Excess molar volume and viscosity deviation of [C2mim][NTf2]/[C4mim][NTf2]+ DMC/DEC. Journal of Chemical & Engineering Data 2018;63(12):4484-96.

[117] Crosthwaite JM, Muldoon MJ, Dixon JK, Anderson JL, Brennecke JF. Phase transition and decomposition temperatures, heat capacities and viscosities of pyridinium ionic liquids. The Journal of Chemical Thermodynamics 2005;37(6):559-68.

[118] Fröba AP, Kremer H, Leipertz A. Density, refractive index, interfacial tension, and viscosity of ionic liquids [EMIM][EtSO4],[EMIM][NTf2],[EMIM][N (CN) 2], and [OMA][NTf2] in dependence on temperature at atmospheric pressure. The Journal of Physical Chemistry B 2008;112(39):12420-30.

[119] Tokuda H, Hayamizu K, Ishii K, Susan MABH, Watanabe M. Physicochemical properties and structures of room temperature ionic liquids. 2. Variation of alkyl chain length in imidazolium cation. The Journal of Physical Chemistry B 2005;109(13):6103-10.

[120] Anwar N, Yasmeen S. Volumetric, compressibility and viscosity studies of binary mixtures of [EMIM][NTf2] with ethylacetate/methanol at (298.15–323.15) K. Journal of Molecular Liquids 2016;224:189-200.

[121] Doblinger S, Silvester D, Gomes MC. Functionalized imidazolium bis (trifluoromethylsulfonyl) imide ionic liquids for gas Sensors: Solubility of H2, O2 and SO2. Fluid Phase Equilibria 2021;549:113211.

[122] Camper D, Becker C, Koval C, Noble R. Diffusion and solubility measurements in room temperature ionic liquids. Industrial & engineering chemistry research 2006;45(1):445-50.

[123] Kadyan A, Pandey S. Lithium bis (trifluoromethylsulfonyl) imide-added ionic liquid 1-ethyl-3-methylimidazolium bis (trifluoromethylsulfonyl) imide mixture: Densities and dynamic viscosities in the temperature range (298.15–358.15) K. The Journal of Chemical Thermodynamics 2018;116:159-65.

[124] Salinas R, Pla-Franco J, Lladosa E, Monton JB. Density, speed of sound, viscosity, and excess properties of binary mixtures formed by ethanol and bis (trifluorosulfonyl) imide-based ionic liquids. Journal of Chemical & Engineering Data 2015;60(3):525-40.

[125] Vuksanovic JM, Calado MS, Ivanis GR, Kijevcanin ML, Serbanovic SP, Visak ZP. Environmentally friendly solutions of liquid poly (ethylene glycol) and imidazolium based ionic liquids with bistriflamide and triflate anions: Volumetric and viscosity studies. Fluid phase equilibria 2013;352:100-9.

[126] Annat G, Forsyth M, MacFarlane DR. Ionic Liquid Mixtures Variations in Physical Properties and Their Origins in Molecular Structure. The Journal of Physical Chemistry B 2012;116(28):8251-8.

[127] Fillion JJ, Brennecke JF. Viscosity of ionic liquid–ionic liquid mixtures. Journal of Chemical & Engineering Data 2017;62(6):1884-901.

[128] Bailey HE, Wang Y-L, Fayer MD. Impact of hydrogen bonding on the dynamics and structure of protic ionic liquid/water binary mixtures. The Journal of Physical Chemistry B 2017;121(36):8564-76.

[129] Liu Q, Zhao L, Ma L, Chu J, Wang J, Zang Y. Hydroxyethyl group effect on properties of bis [(trifluoromethyl) sulfonyl] imide-type ionic liquids. Journal of Chemical & Engineering Data 2020;65(10):4780-9.

[130] Zorębski M, Zorebski E, Dzida M, Skowronek J, Jezak S, Goodrich P, et al. Ultrasonic relaxation study of 1-alkyl-3-methylimidazolium-based room-temperature ionic liquids: probing the role of alkyl chain length in the cation. The Journal of Physical Chemistry B 2016;120(14):3569-81.

[131] Gómez E, Calvar N, Macedo EA, Domínguez Á. Effect of the temperature on the physical properties of pure 1-propyl 3-methylimidazolium bis (trifluoromethylsulfonyl) imide and characterization of its binary mixtures with alcohols. The Journal of Chemical Thermodynamics 2012;45(1):9-15.

[132] Papović S, Vraneš M, Gadžurić S. A comprehensive study of {γ-butyrolactone+ 1-methyl-3-propylimidazolium bis (trifluoromethylsulfonyl) imide} binary mixtures. The Journal of Chemical Thermodynamics 2015;91:360-8.

[133] Ramenskaya L, Grishina E, Kudryakova N. Physicochemical features of short-chain 1-alkyl-3-methylimidazolium bis (trifluoromethylsulfonyl)-imide ionic liquids containing equilibrium water absorbed from air. Journal of Molecular Liquids 2018;272:759-65.

[134] Xue L, Gurung E, Tamas G, Koh YP, Shadeck M, Simon SL, et al. Effect of alkyl chain branching on physicochemical properties of imidazolium-based ionic liquids. Journal of Chemical & Engineering Data 2016;61(3):1078-91.

[135] Alcalde R, Atilhan M, Aparicio S. Intermolecular forces in 1-butyl-3-methylimidazolium bis (trifluoromethylsulfonyl) imide+ ethanol mixtures. Journal of Molecular Liquids 2018;258:1-9.

[136] Martins MA, Sharma G, Pinho SP, Gardas RL, Coutinho JA, Carvalho PJ. Selection and characterization of non-ideal ionic liquids mixtures to be used in CO2 capture. Fluid Phase Equilibria 2020;518:112621.

[137] Tariq M, Esperanca JM, Rebelo LP, Paredes X, Santos FJ, de Castro CAN. Viscosity of [C4mim][(CF3SO2) 2N],[C4mim][N (CN) 2],[C2mim][C2H5SO4] and [Aliquat][N (CN) 2] in a wide temperature range. Measurement, correlation, and interpretation. Journal of Molecular Liquids 2021;337:116482.

[138] Chen H, He Y, Zhu J, Alias H, Ding Y, Nancarrow P, et al. Rheological and heat transfer behaviour of the ionic liquid,[C4mim][NTf2]. International Journal of Heat and Fluid Flow 2008;29(1):149-55.

[139] Vranes M, Dozic S, Djeric V, Gadzuric S. Physicochemical Characterization of 1-Butyl-3-methylimidazolium and 1-Butyl-1-methylpyrrolidinium Bis (trifluoromethylsulfonyl) imide. Journal of Chemical & Engineering Data 2012;57(4):1072-7.

[140] Rout A, Mishra S, Venkatesan K, Antony M, Pandey N. Investigations on the physicochemical and radiolytic degradation properties of Tri-n-butylphosphate–ionic liquid in the presence of nitric acid. Journal of Solution Chemistry 2018;47:373-86.

[141] Main KL, Eberl BK, McDaniel D, Tikadar A, Paul TC, Khan JA. Nanoparticles size effect on thermophysical properties of ionic liquids based nanofluids. Journal of Molecular Liquids 2021;343:117609.

[142] Soldatović D, Vuksanović J, Radović I, Višak Z, Kijevčanin M. Excess molar volumes and viscosity behaviour of binary mixtures of aniline/or N, N-dimethylaniline with imidazolium ionic liquids having triflate or bistriflamide anion. The Journal of Chemical Thermodynamics 2017;109:137-54.

[143] Hiraga Y, Kato A, Sato Y, Smith Jr RL. Densities at pressures up to 200 MPa and atmospheric pressure viscosities of ionic liquids 1-ethyl-3-methylimidazolium methylphosphate, 1-ethyl-3-methylimidazolium diethylphosphate, 1-butyl-3-methylimidazolium acetate, and 1-butyl-3-methylimidazolium bis (trifluoromethylsulfonyl) imide. Journal of Chemical & Engineering Data 2015;60(3):876-85.

[144] Vraneš M, Zec N, Tot A, Papović S, Dožić S, Gadžurić S. Density, electrical conductivity, viscosity and excess properties of 1-butyl-3-methylimidazolium bis (trifluoromethylsulfonyl) imide+ propylene carbonate binary mixtures. The Journal of Chemical Thermodynamics 2014;68:98-108.

[145] Otero I, Lepre L, Dequidt A, Husson P, Costa Gomes M. How does the addition of a third ion affect the molecular interactions and the thermodynamic properties of acetate-based ionic liquids? The Journal of Physical Chemistry B 2017;121(41):9725-36.

[146] Liu H, Maginn E, Visser AE, Bridges NJ, Fox EB. Thermal and transport properties of six ionic liquids: an experimental and molecular dynamics study. Industrial & Engineering Chemistry Research 2012;51(21):7242-54.

[147] Vraneš M, Papović S, Tot A, Zec N, Gadžurić S. Density, excess properties, electrical conductivity and viscosity of 1-butyl-3-methylimidazolium bis (trifluoromethylsulfonyl) imide+ γ-butyrolactone binary mixtures. The Journal of Chemical Thermodynamics 2014;76:161-71.

[148] Fatima U, Anwar N, Montes-Campos H, Varela LM. Molecular dynamic simulation, molecular interactions and structural properties of 1-butyl-3-methylimidazolium bis (trifluoromethylsulfonyl) imide+ 1-butanol/1-propanol mixtures at (298.15–323.15) K and 0.1 M Pa. Fluid phase equilibria 2018;472:9-21.

[149] Malek NI, Ijardar SP. Binary mixtures of ([C4mim][NTf2]+ molecular organic solvents): Thermophysical, acoustic and transport properties at various compositions and temperatures. The Journal of Chemical Thermodynamics 2016;93:75-85.

[150] Shang D, Zhang X, Zeng S, Jiang K, Gao H, Dong H, et al. Protic ionic liquid [Bim][NTf 2] with strong hydrogen bond donating ability for highly efficient ammonia absorption. Green Chemistry 2017;19(4):937-45.

[151] Yasmeen S, Anwar N. Interaction of 1-butyl-3-methylimidazolium bis (trifluoromethylsulfonyl)-imide with methanol/dimethyl sulfoxide at (298.15, 303.15, 308.15, 313.15, 318.15 and 323.15) K: Measurements and correlations of thermophysical properties. Journal of Molecular Liquids 2016;221:1207-17.

[152] Srour H, Traïkia M, Fenet B, Rouault H, Costa Gomes MF, Santini CC, et al. Effect of nitrile-functionalization of imidazolium-based ionic liquids on their transport properties, both pure and mixed with lithium salts. Journal of Solution Chemistry 2015;44:495-510.

[153] Kanakubo M, Makino T, Umecky T. CO2 solubility in and physical properties for ionic liquid mixtures of 1-butyl-3-methylimidazolium acetate and 1-butyl-3-methylimidazolium bis (trifluoromethanesulfonyl) amide. Journal of Molecular Liquids 2016;217:112-9.

[154] McFarlane J, Ridenour W, Luo H, Hunt R, DePaoli D, Ren R. Room temperature ionic liquids for separating organics from produced water. Separation science and technology 2005;40(6):1245-65.

[155] Singh S, Bahadur I, Naidoo P, Redhi G, Ramjugernath D. Application of 1-butyl-3-methylimidazolium bis (trifluoromethylsulfonyl) imide ionic liquid for the different types of separations problem: Activity coefficients at infinite dilution measurements using gas-liquid chromatography technique. Journal of Molecular Liquids 2016;220:33-40.

[156] Andanson J-M, Papaiconomou N, Cable P-A, Traïkia M, Billard I, Husson P. The role of association of ions in ionic liquid/molecular solvent mixtures on metal extraction. Physical Chemistry Chemical Physics 2017;19(42):28834-40.

[157] Rocha MA, Neves CM, Freire MG, Russina O, Triolo A, Coutinho JA, et al. Alkylimidazolium based ionic liquids: impact of cation symmetry on their nanoscale structural organization. The journal of physical chemistry b 2013;117(37):10889-97.

[158] Diogo JCF, Caetano FJP, Fareleira JMNA, Wakeham WA. Viscosity measurements of three ionic liquids using the vibrating wire technique. Fluid Phase Equilibria 2013;353:76-86. <https://doi.org/https://doi.org/10.1016/j.fluid.2013.05.012>.

[159] Harris KR, Kanakubo M. Temperature and Pressure Dependence of the Viscosity of the Ionic Liquids 1-Hexyl-3-methylimidazolium Tetrafluoroborate and 1-Ethyl- and 1-Hexyl-3-methylimidazolium Bis(trifluoromethylsulfonyl)amides. Journal of Chemical & Engineering Data 2021;66(12):4618-28. <https://doi.org/10.1021/acs.jced.1c00628>.

[160] Kandil ME, Marsh KN, Goodwin AR. Measurement of the viscosity, density, and electrical conductivity of 1-hexyl-3-methylimidazolium bis (trifluorosulfonyl) imide at temperatures between (288 and 433) K and pressures below 50 MPa. Journal of Chemical & Engineering Data 2007;52(6):2382-7.

[161] Widegren JA, Magee JW. Density, viscosity, speed of sound, and electrolytic conductivity for the ionic liquid 1-hexyl-3-methylimidazolium bis (trifluoromethylsulfonyl) imide and its mixtures with water. Journal of Chemical & Engineering Data 2007;52(6):2331-8.

[162] Nazet A, Sokolov S, Sonnleitner T, Makino T, Kanakubo M, Buchner R. Densities, viscosities, and conductivities of the imidazolium ionic liquids [Emim][Ac],[Emim][FAP],[Bmim][BETI],[Bmim][FSI],[Hmim][TFSI], and [Omim][TFSI]. Journal of Chemical & Engineering Data 2015;60(8):2400-11.

[163] Iguchi M, Hiraga Y, Sato Y, Aida TM, Watanabe M, Smith Jr RL. Measurement of high-pressure densities and atmospheric viscosities of ionic liquids: 1-hexyl-3-methylimidazolium bis (trifluoromethylsulfonyl) imide and 1-hexyl-3-methylimidazolium chloride. Journal of Chemical & Engineering Data 2014;59(3):709-17.

[164] Diogo JC, Caetano FJ, Fareleira JM, Wakeham WA. Viscosity measurements of three ionic liquids using the vibrating wire technique. Fluid Phase Equilibria 2013;353:76-86.

[165] Maginn EJ. Design and evaluation of ionic liquids as novel CO2 absorbents. University of Notre Dame (US); 2004.

[166] Marsh KN, Brennecke JF, Chirico RD, Frenkel M, Heintz A, Magee JW, et al. Thermodynamic and thermophysical properties of the reference ionic liquid: 1-Hexyl-3-methylimidazolium bis [(trifluoromethyl) sulfonyl] amide (including mixtures). Part 1. Experimental methods and results (IUPAC Technical Report). Pure and applied chemistry 2009;81(5):781-90.

[167] Zhang Y, Wang X, Yin J. Viscosity of saturated mixtures of 1-hexyl-3-methyl-imidazolium bis (trifluoromethylsulfonyl) amide with R600a and R152a. The Journal of Chemical Thermodynamics 2020;141:105970.

[168] Fillion JJ, Xia H, Desilva MA, Quiroz-Guzman M, Brennecke JF. Phase transitions, decomposition temperatures, viscosities, and densities of phosphonium, ammonium, and imidazolium ionic liquids with aprotic heterocyclic anions. Journal of Chemical & Engineering Data 2016;61(8):2897-914.

[169] Akbar MM, Murugesan T. Thermophysical properties for the binary mixtures of 1-hexyl-3-methylimidazolium bis (trifluoromethylsulfonyl) imide [hmim][Tf2N]+ N-methyldiethanolamine (MDEA) at temperatures (303.15 to 323.15) K. Journal of Molecular Liquids 2012;169:95-101.

[170] Calado MS, Branco AS, Diogo JC, Fareleira JM, Visak ZP. Solubility, volumetric properties and viscosity of the sustainable systems of liquid poly (ethylene glycol) 200 with imidazolium-and phosphonium-based ionic liquids: Cation and anion effects. The Journal of Chemical Thermodynamics 2015;80:79-91.

[171] Warmińska D, Cichowska-Kopczyńska I. Thermodynamic study of binary mixtures of 2-propanol with ionic liquids, 1-hexyl-3-methylimidazolium bis (trifluoromethylsulfonyl) imide, 1-hexyl-3-methylimidazolium trifluoromethanesulfonate and triethylhexylammonium bis (trifluoromethylsulfonyl) imide. The Journal of Chemical Thermodynamics 2022;171:106789.

[172] Ahosseini A, Weatherley LR, Scurto AM. Viscosity and Diffusivity for the Ionic Liquid 1-Hexyl-3-methyl-imidazolium Bis(trifluoromethylsulfonyl)amide with 1-Octene. Journal of Chemical & Engineering Data 2011;56(10):3715-21. <https://doi.org/10.1021/je1009224>.

[173] Fillion JJ, Bennett JE, Brennecke JF. The viscosity and density of ionic liquid+ tetraglyme mixtures and the effect of tetraglyme on CO2 Solubility. Journal of Chemical & Engineering Data 2017;62(2):608-22.

[174] Ahosseini A, Ren W, Weatherley LR, Scurto AM. Viscosity and self-diffusivity of ionic liquids with compressed hydrofluorocarbons: 1-Hexyl-3-methyl-imidazolium bis (trifluoromethylsulfonyl) amide and 1, 1, 1, 2-tetrafluoroethane. Fluid Phase Equilibria 2017;437:34-42.

[175] Almantariotis D, Pensado A, Gunaratne HN, Hardacre C, Pádua A, Coxam J-Y, et al. Influence of Fluorination on the Solubilities of Carbon Dioxide, Ethane, and Nitrogen in 1-n-Fluoro-alkyl-3-methylimidazolium Bis (n-fluoroalkylsulfonyl) amide Ionic Liquids. The Journal of Physical Chemistry B 2017;121(2):426-36.

[176] Alonso L, Arce A, Francisco Ma, Soto A. Liquid− Liquid equilibria for [C8mim][NTf2]+ thiophene+ 2, 2, 4-trimethylpentane or+ toluene. Journal of Chemical & Engineering Data 2008;53(8):1750-5.

[177] Yamaguchi T, Kikuzawa T. High-frequency shear viscosity and ionic mobility of solutions of polyethylene glycol in ionic liquids. Journal of Molecular Liquids 2019;284:252-7.

[178] Hazrati N, Abdouss M, Miran Beigi AA, Pasban AA, Rezaei M. Physicochemical properties of long chain alkylated imidazolium based chloride and bis (trifluoromethanesulfonyl) imide ionic liquids. Journal of Chemical & Engineering Data 2017;62(10):3084-94.

[179] Pinto AM, Rodríguez H, Arce A, Soto A. Combined physical and chemical absorption of carbon dioxide in a mixture of ionic liquids. The Journal of Chemical Thermodynamics 2014;77:197-205.

[180] Bastos PD, Oliveira FS, Rebelo LP, Pereiro AB, Marrucho IM. Separation of azeotropic mixtures using high ionicity ionic liquids based on 1-ethyl-3-methylimidazolium thiocyanate. Fluid Phase Equilibria 2015;389:48-54.

[181] Navia P, Troncoso J, Romaní L. Viscosities for ionic liquid binary mixtures with a common ion. Journal of solution chemistry 2008;37:677-88.

[182] Kodama D, Sato K, Watanabe M, Sugawara T, Makino T, Kanakubo M. Density, Viscosity, and CO2 Solubility in the Ionic Liquid Mixtures of [bmim][PF6] and [bmim][TFSA] at 313.15 K. Journal of Chemical & Engineering Data 2017;63(4):1036-43.
